# Supplementary material for: A magnetically tuneable piezoresistive sensor for direct, in situ strain measurements in Li-ion batteries
Source: Royal Society of Chemistry journal article supplement (doi:10.1039/c5ay00626k), 2015-01-01
Supplement: c5ay00626k1.pdf [file c5ay00626k1.pdf]

## Magnetically tuneable piezoresistive sensor for direct, *in situ* strain measurement in Li-ion batteries

J. Matthew Kaule,<sup>a</sup> Lance R. Hoffman,<sup>b</sup> Hitomi Mukaibo<sup>\*ab</sup>

<sup>a</sup> Department of Chemical Engineering, University of Rochester, U.S.A.

<sup>b</sup> Materials Science Program, University of Rochester, U.S.A.

### Supplementary Information

#### Ohmic response of the PRM sample

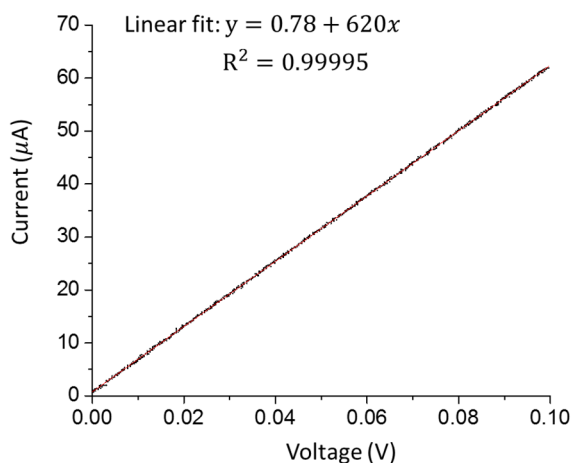

Fig. S1 I-V curve of the c-PRM sample with 33 wt % Ni under zero strain. The PRM had been infiltrated with 1 M LiClO<sub>4</sub>/EC + PC electrolyte prior to the experiment. Black dots are the data and the red line is the linear fit to the data.

#### Gauge Factor calculation

Gauge factor,  $\Gamma$ , was calculated using the equation<sup>1</sup>:

$$\Gamma = -G(1 - 2\nu) - (1 + 2\nu)$$

Where  $\nu$  is Poisson's ratio ( $\sim 0.35$  for polymer composites) and  $G$  is the slope of the plots below.

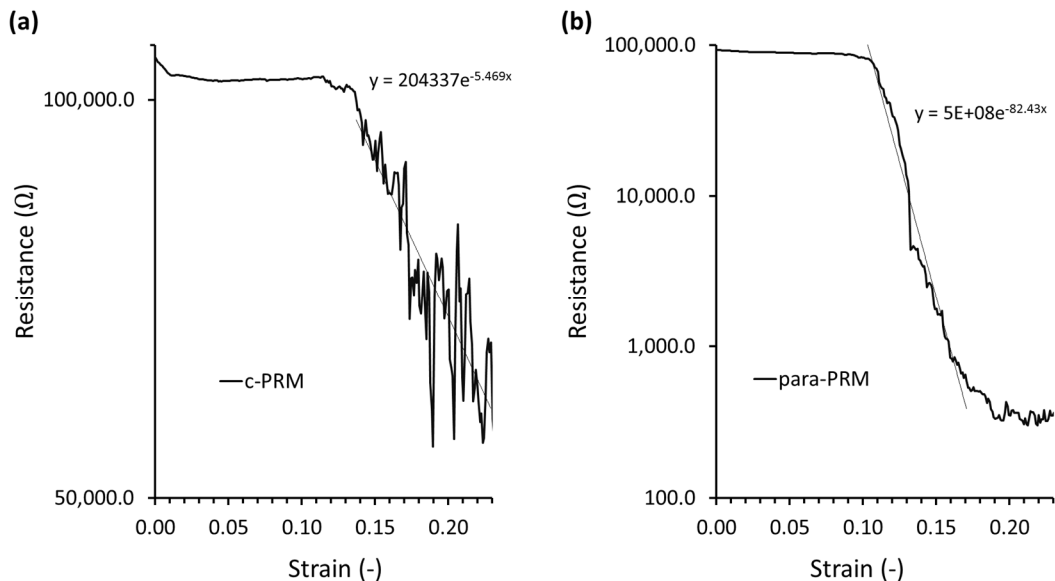

Fig. S2 Logarithm of resistance versus the strain. The dotted lines are fitted linear lines used to calculate the G value.

### X-ray diffraction of Sn before and after lithiation

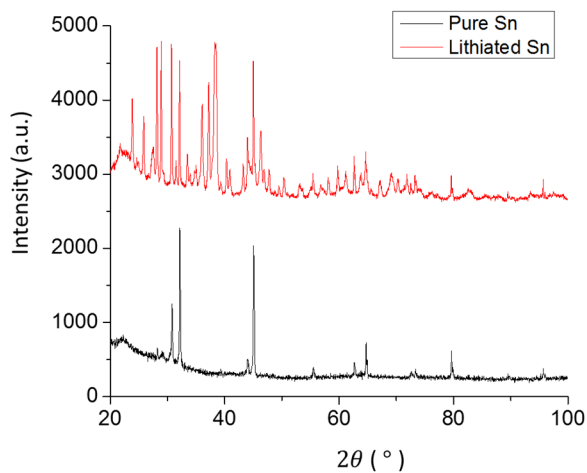

Fig. S3 X-ray diffraction data of the 2-mm thick Sn foil (a) before and (b) after lithiation to 0.01 V. The Sn was lithiated at 0.5 mA/g Sn using Li counter electrode and 1 M  $\text{LiClO}_4/\text{EC} + \text{PC}$  electrolyte. Data comparison with JCPDS cards indicate that additional peaks in lithiated Sn can be attributed to multiple  $\text{Li}_x\text{Sn}_y$  phases.

### Reference

- 1 M. K. Abyaneh and S. K. Kulkarni, *J. Phys. D: Appl. Phys.*, 2008, **41**, 135405/135401-135405/135407.
